# Supplementary material for: Isolation and Anticancer Progression Evaluation of the Chemical Constituents from Bridelia balansae Tutcher
Source: MDPI journal article supplement (doi:10.3390/molecules28166165), 2023-08-21
Supplement: s1 [file s1]

## Support information

### Isolation and bioactivity evaluation of the chemical constituents from *Bridelia balansae* Tutcher

**Lihan Zhao** <sup>1,2,†</sup>, **Wen-Jian Xie** <sup>1,†</sup>, **Yin-Xiao Du** <sup>1,†</sup>, **Yi-Xuan Xia** <sup>1</sup>, **Kang-Lun Liu** <sup>1</sup>, **Chuen Fai Ku** <sup>1</sup>, **Zihao Ou** <sup>4</sup>, **Ming-Zhong Wang** <sup>3,\*</sup> and **Hong-Jie Zhang** <sup>1,\*</sup>

1 School of Chinese Medicine, Hong Kong Baptist University, Kowloon, Hong Kong SAR, China

2 Department of Biology, Georgia State University, Atlanta, GA, USA

3 College of Pharmacy, Shenzhen Technology University, Shenzhen, China

4 Department of Materials Science and Engineering, Stanford University, Stanford, CA 94305, USA

\* Correspondance : wangmingzhong@sztu.edu.cn (M.-Z.W.) ; zhanghj@hkbu.edu.hk (H.-J.Z.) ;

† These authors contributed equally to this work.

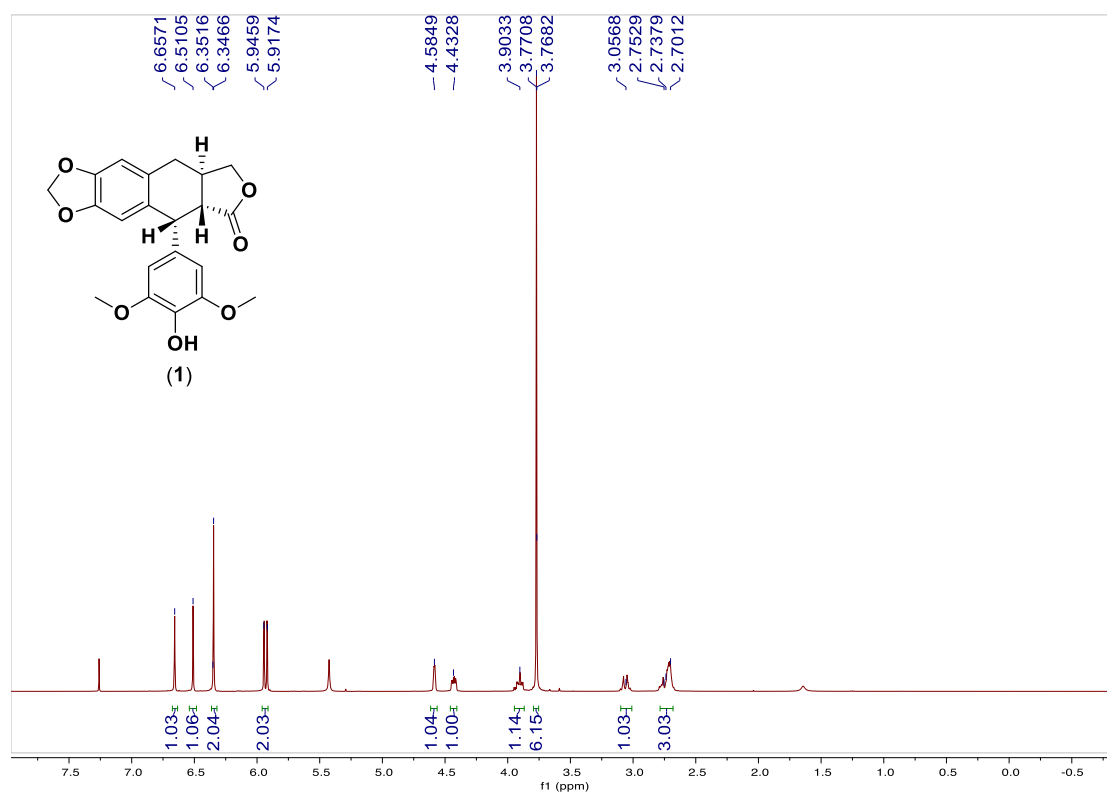

Figure S1. The proton NMR spectrum of compound 1

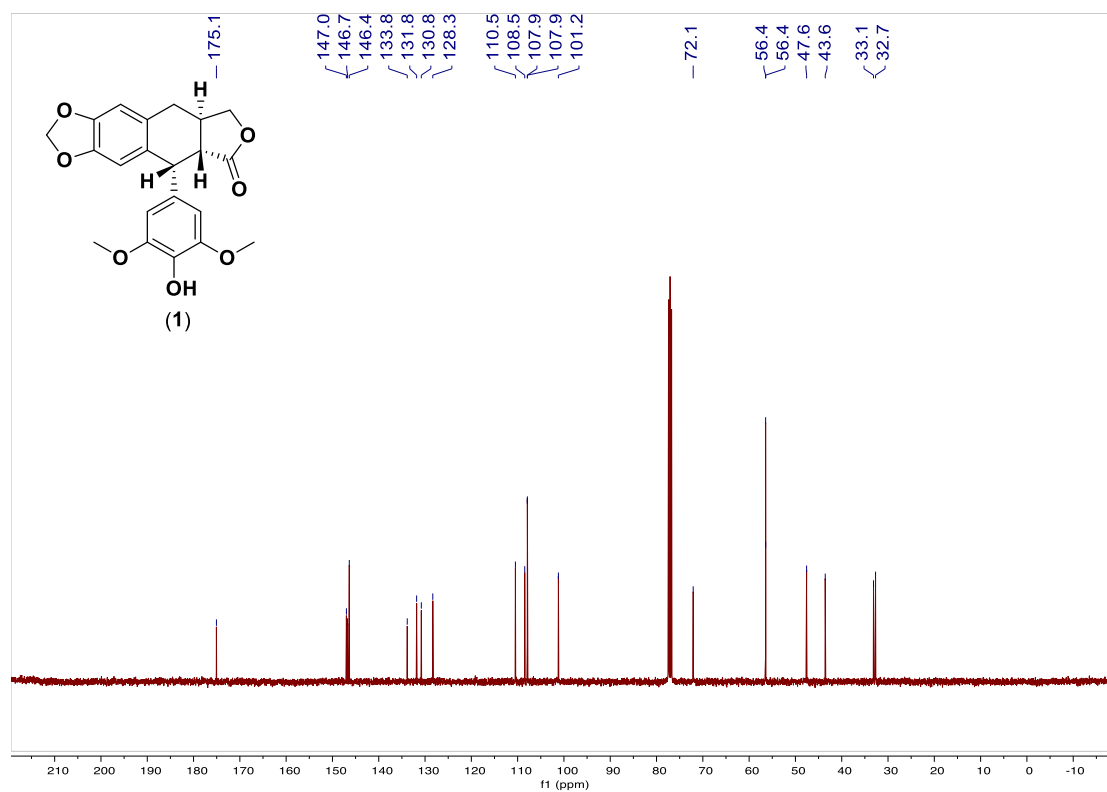

Figure S2. The  $^{13}\text{C}$  NMR spectrum of compound 1

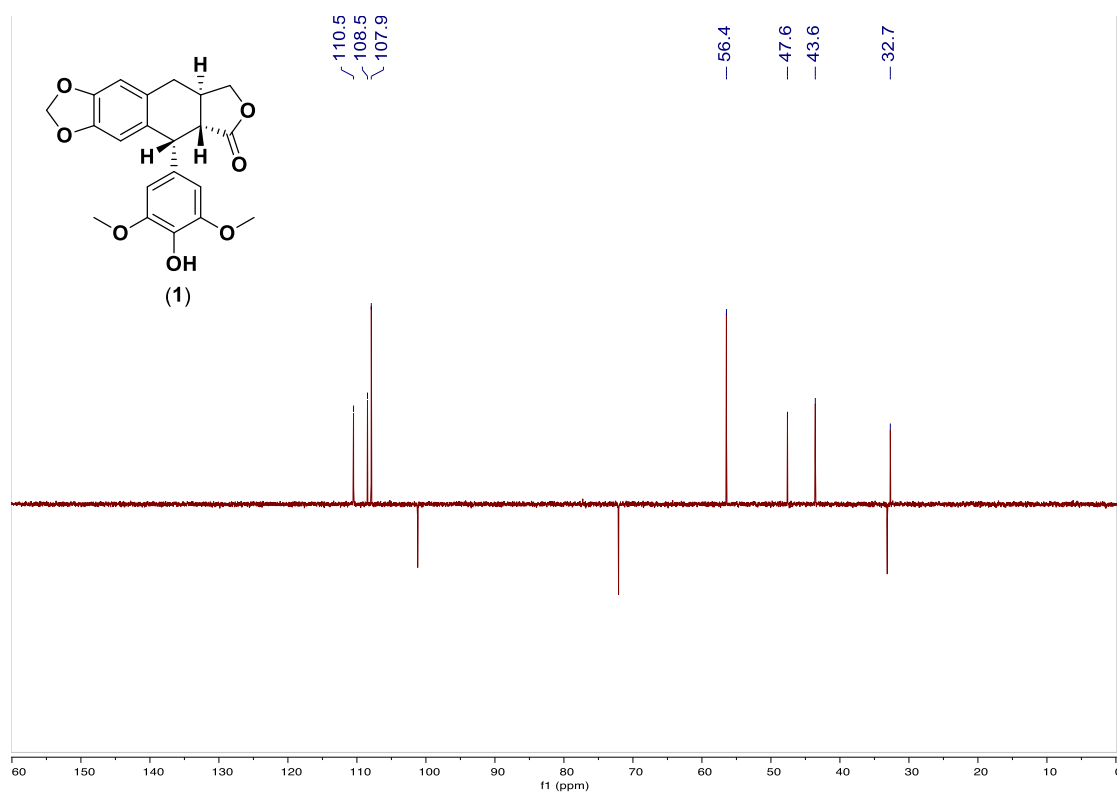

Figure S3. The DEPT135 NMR spectrum of compound 1

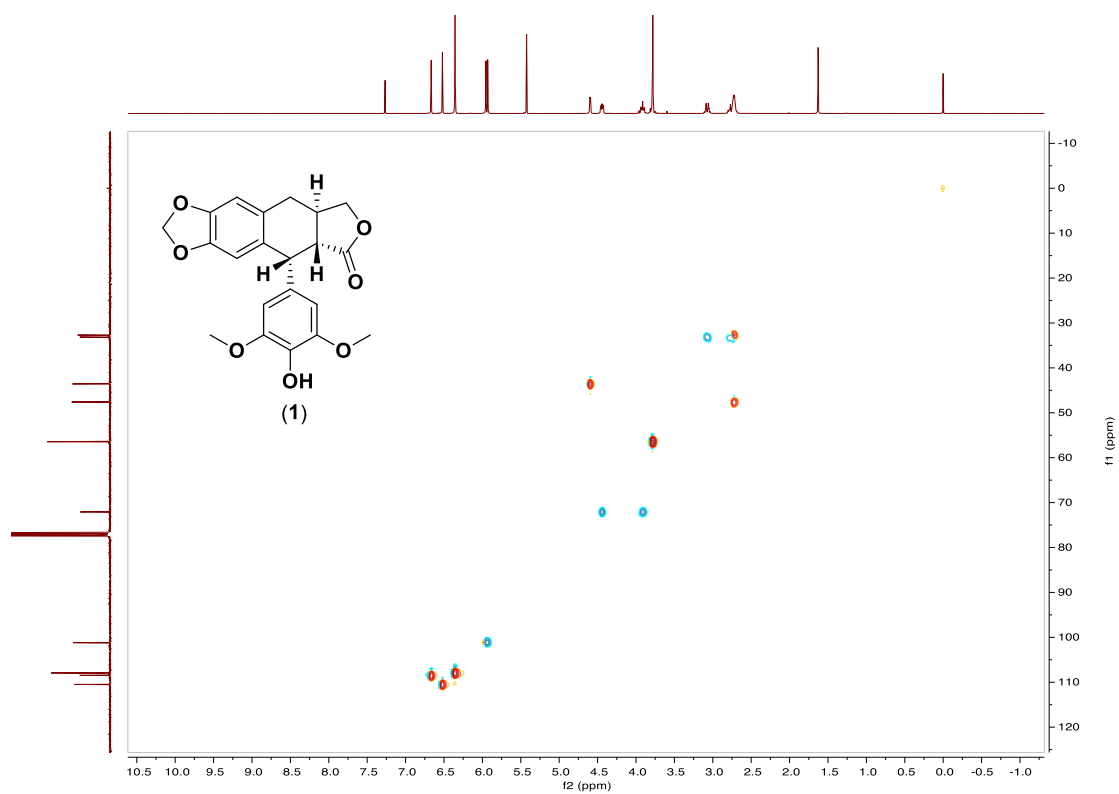

Figure S4. The HSQC NMR spectrum of compound 1

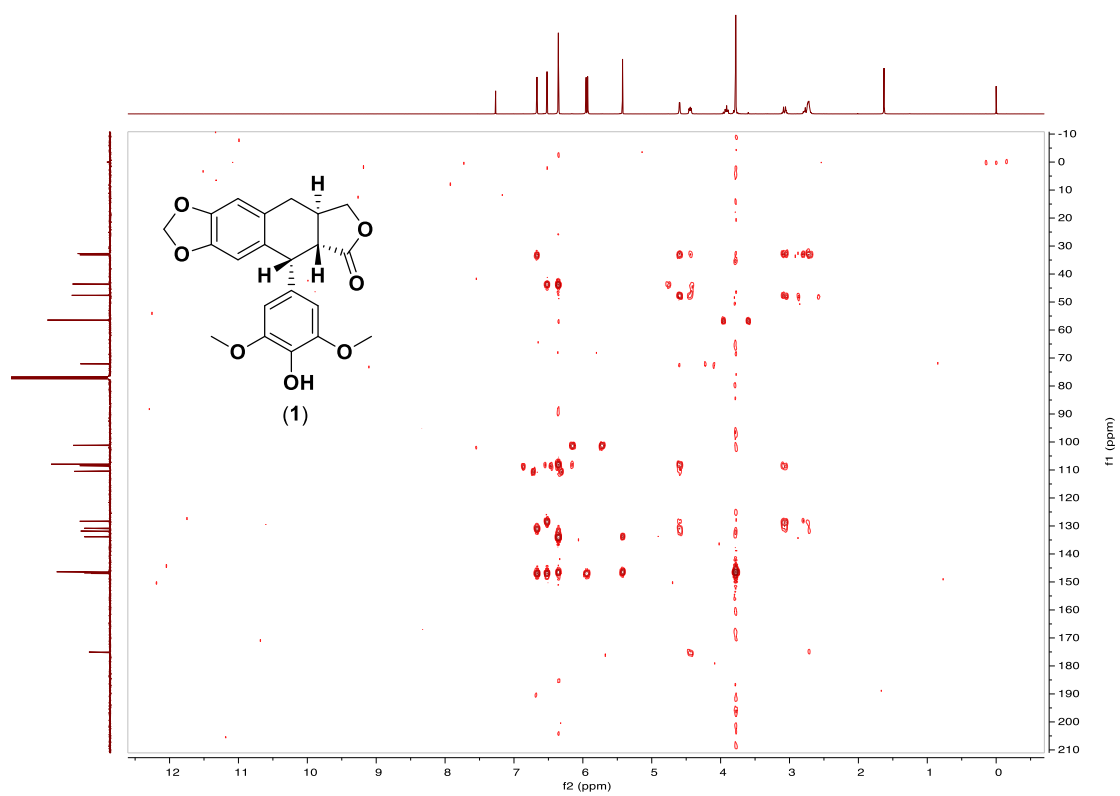

Figure S5. The HMBC NMR spectrum of compound 1

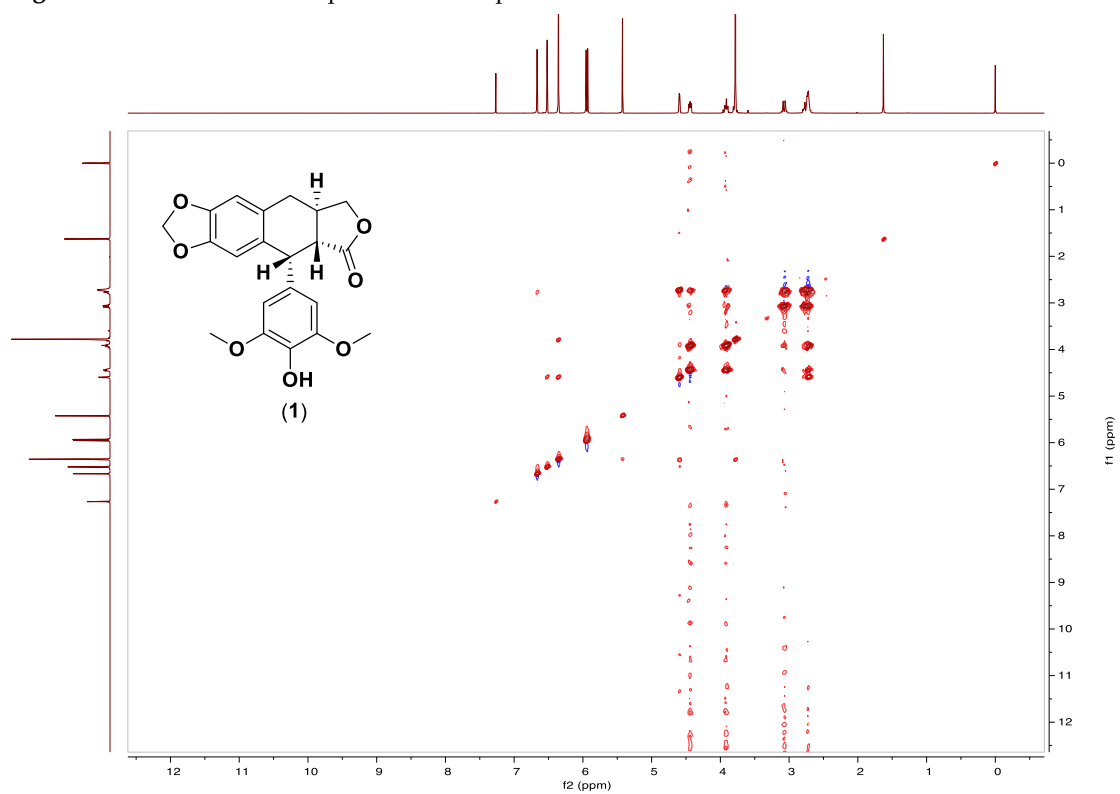

Figure S6. The  $^1\text{H}$ - $^1\text{H}$  COSY NMR spectrum of compound 1

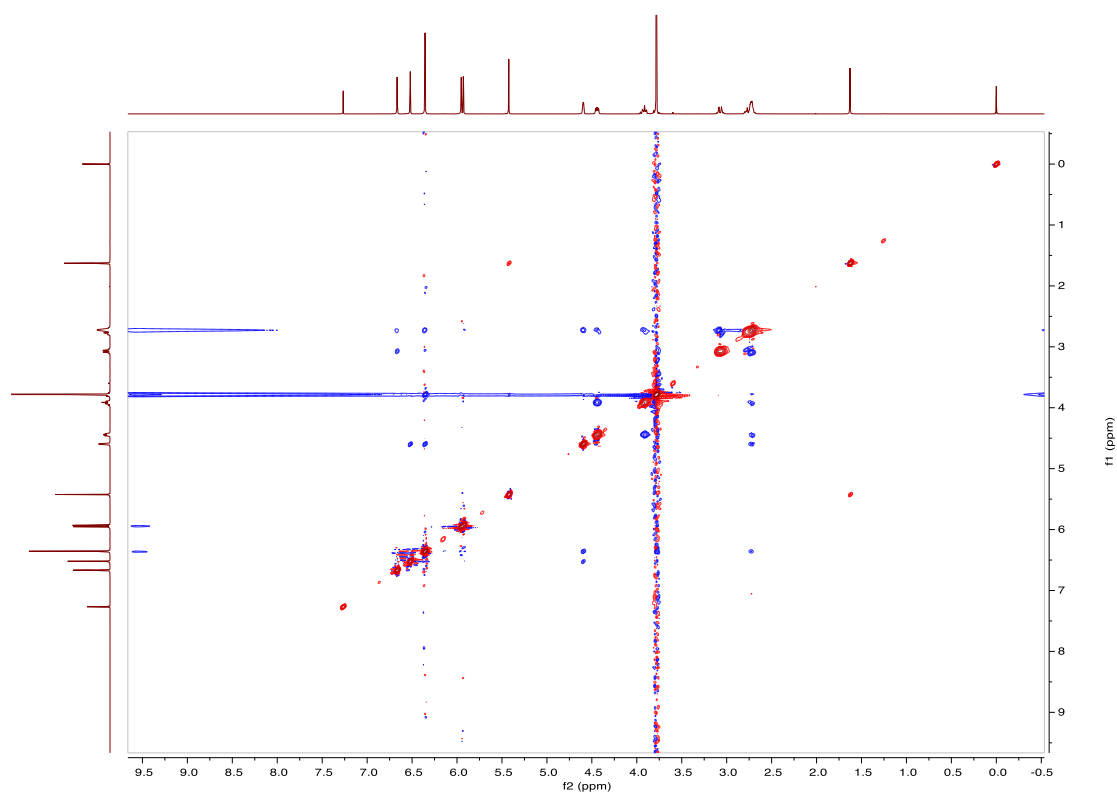

**Figure S7.** The NOESY NMR spectrum of compound **1**

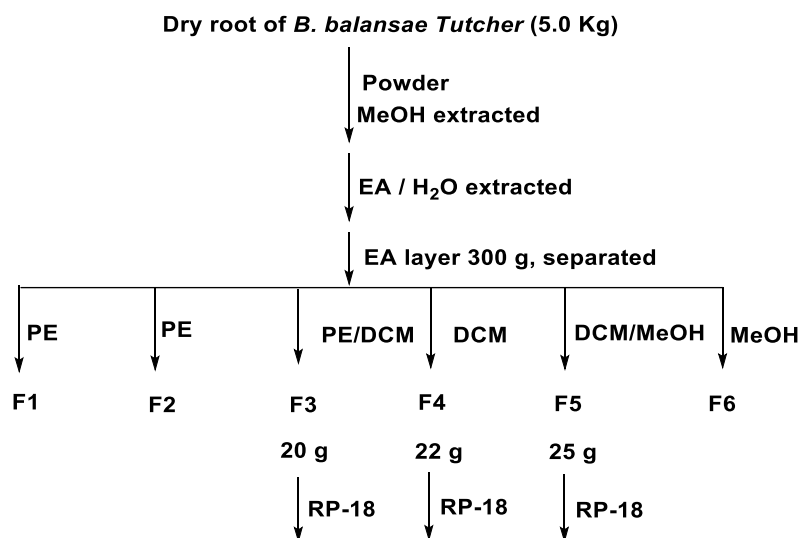

**Figure S8.** The extraction and fraction flow chart of air-dried root of *B. Balansae*

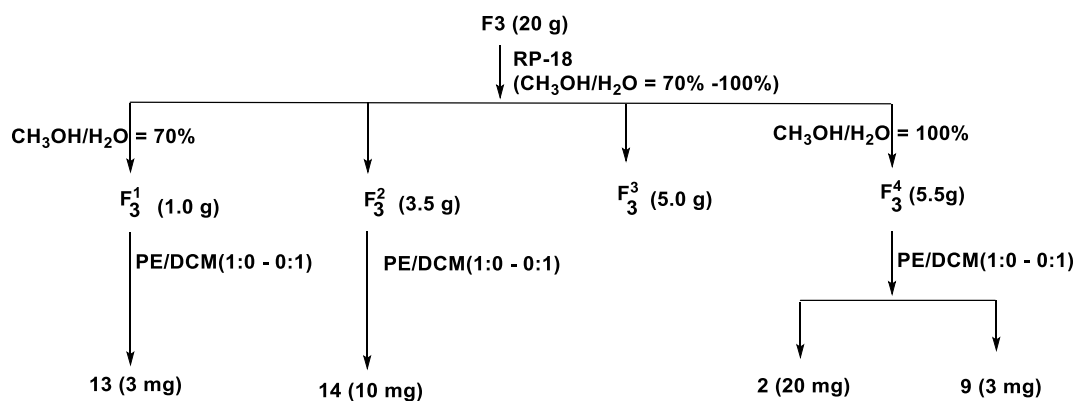

**Figure S9.** The isolation flow chart of sub fraction F3

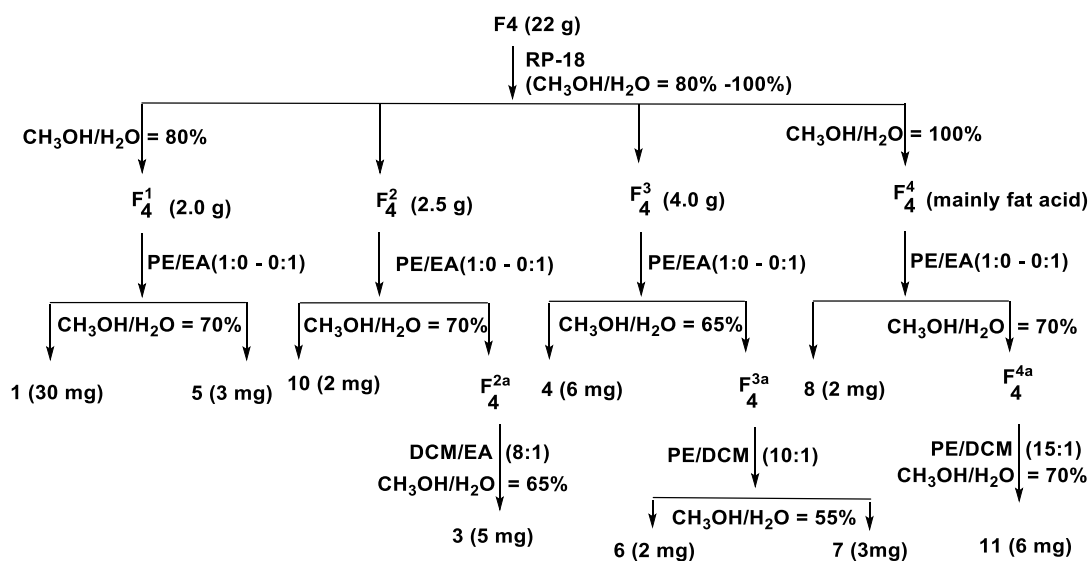

**Figure S10.** The isolation flow chart of sub fraction F4

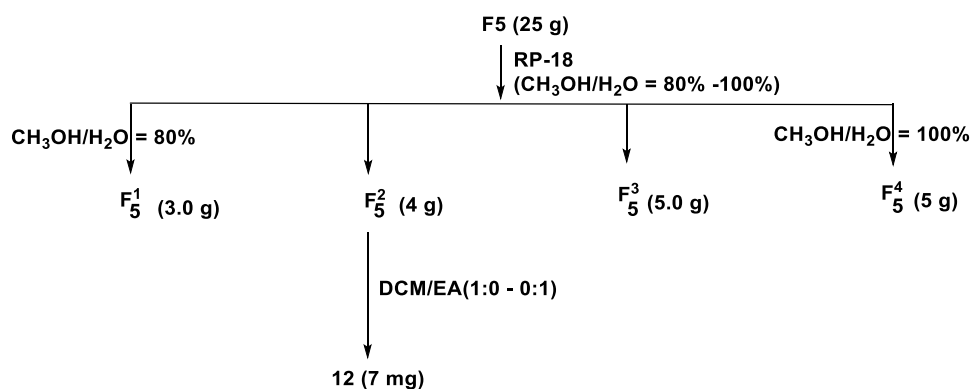

**Figure S11.** The isolation flow chart of sub fraction F5
